# Supplementary material
Source: publisher site journal article supplement (https://www.dovepress.com/article/132369)
Supplement: Supplementary file 1 [file get_supplementary_file.php]

## Supplementary Results

# Selection of potential iron oxide nanoparticles for breast cancer treatment based on in vitro cytotoxicity and cellular uptake

Johanna M Poller<sup>1, 2</sup>, Jan Zaloga<sup>1</sup>, Eveline Schreiber<sup>1</sup>, Harald Unterweger<sup>1</sup>, Christina Janko<sup>1</sup>, Patricia Radon<sup>3</sup>, Dietmar Eberbeck<sup>3</sup>, Lutz Trahms<sup>3</sup>, Christoph Alexiou<sup>1</sup>, Ralf P Friedrich<sup>1</sup>

<sup>1</sup> Department of Otorhinolaryngology, Head and Neck Surgery, Section for Experimental Oncology & Nanomedicine (SEON), Else Kröner-Fresenius-Stiftung Professorship, Universitätsklinikum Erlangen, Erlangen, Germany; <sup>2</sup>Friedrich-Alexander-Universität Erlangen-Nürnberg (FAU), Germany; <sup>3</sup>Physikalisch-Technische Bundesanstalt Braunschweig und Berlin, Berlin, Germany.

Correspondence: Christoph Alexiou.

Department of Otorhinolaryngology, Head and Neck Surgery, Section for Experimental Oncology & Nanomedicine (SEON), Else Kröner-Fresenius-Stiftung Professorship, Universitätsklinikum Erlangen, Glückstrasse 10a, 91054 Erlangen, Germany.

Tel +49 9131 85 33142

Fax +49 9131 85 34828

Email [christoph.alexiou@uk-erlangen.de](mailto:christoph.alexiou@uk-erlangen.de)

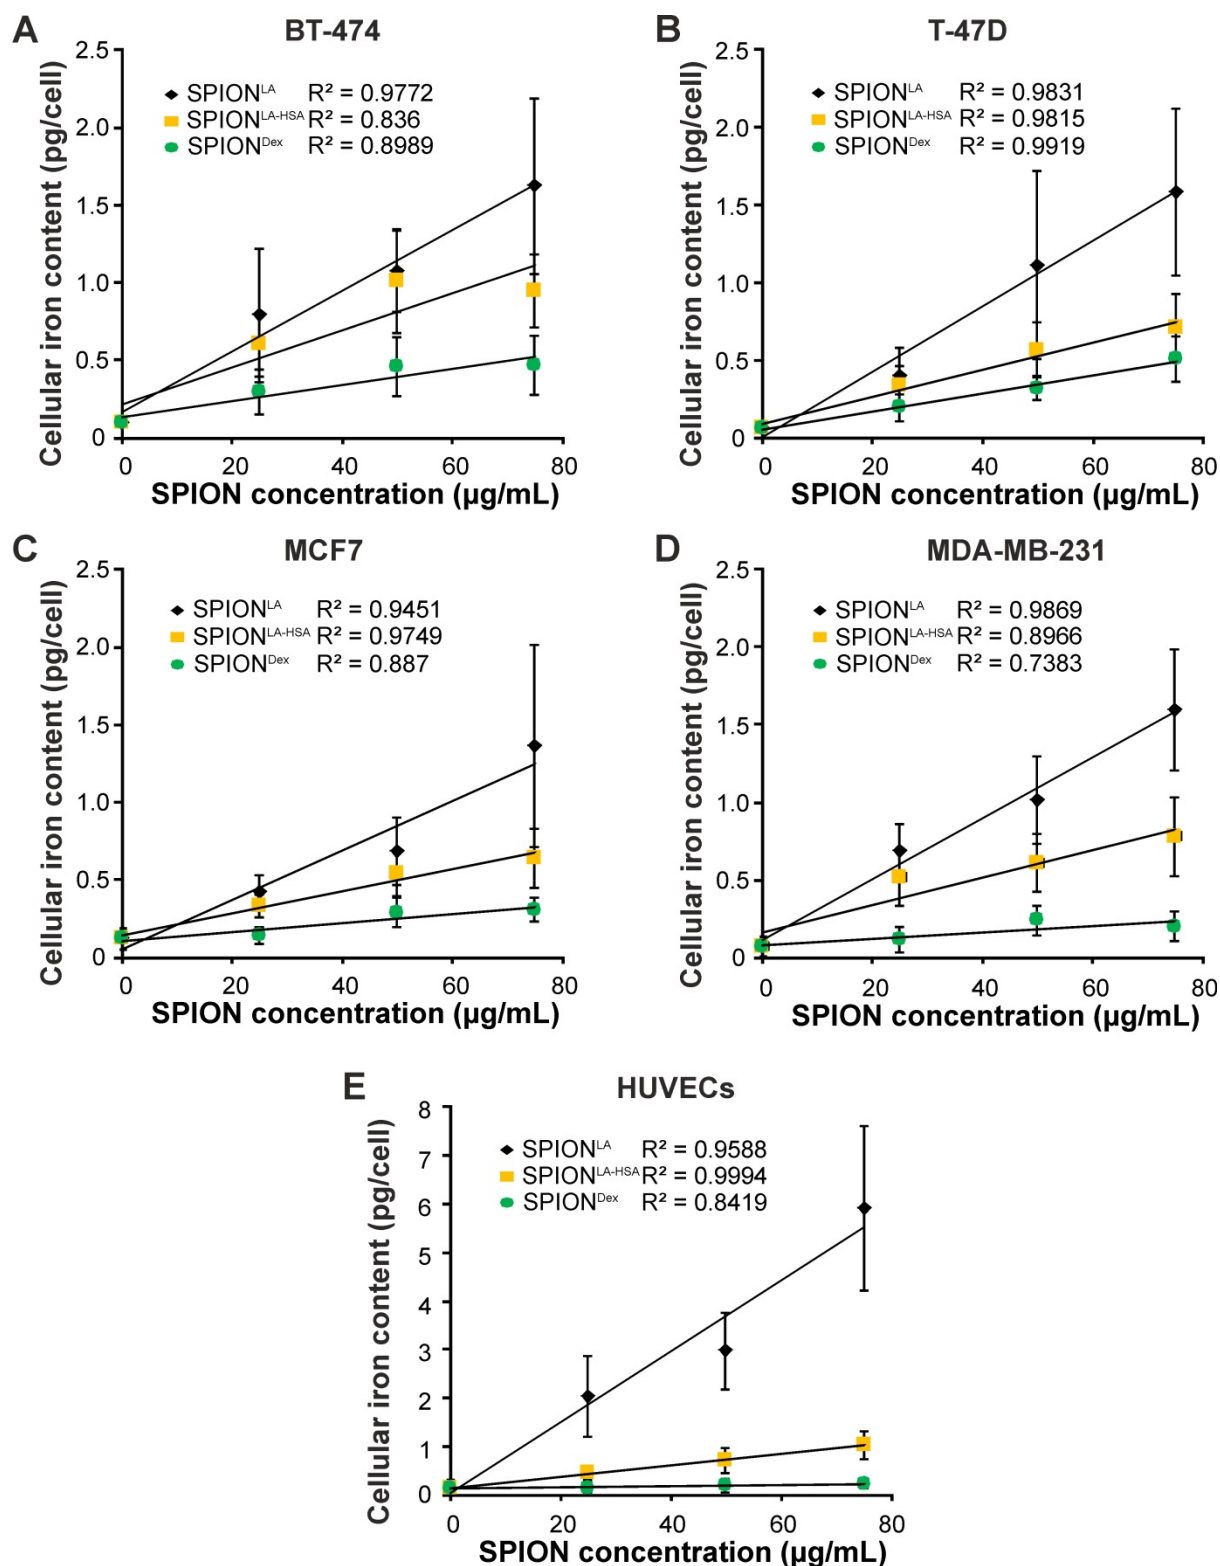

**Supplementary Figure 1: Correlation between Cellular Iron Content and Applied SPION Concentration in the Cell Culture Media.** Cells were incubated for 48 h with different concentrations of SPION<sup>LA</sup>, SPION<sup>LA-HSA</sup> and SPION<sup>Dex</sup>, followed by iron content analysis in cell lysates using microwave plasma-atomic emission spectrometer (MP-AES). MP-AES measurements with increasing SPION concentrations are shown for **(A)** BT-474, **(B)** T-47D, **(C)** MCF7, **(D)** MDA-MB-231 and **(E)** HUVECs. The data are expressed as the mean  $\pm$  standard deviation (n=4 with technical triplicates).  $R^2$  represents the coefficient of determination.

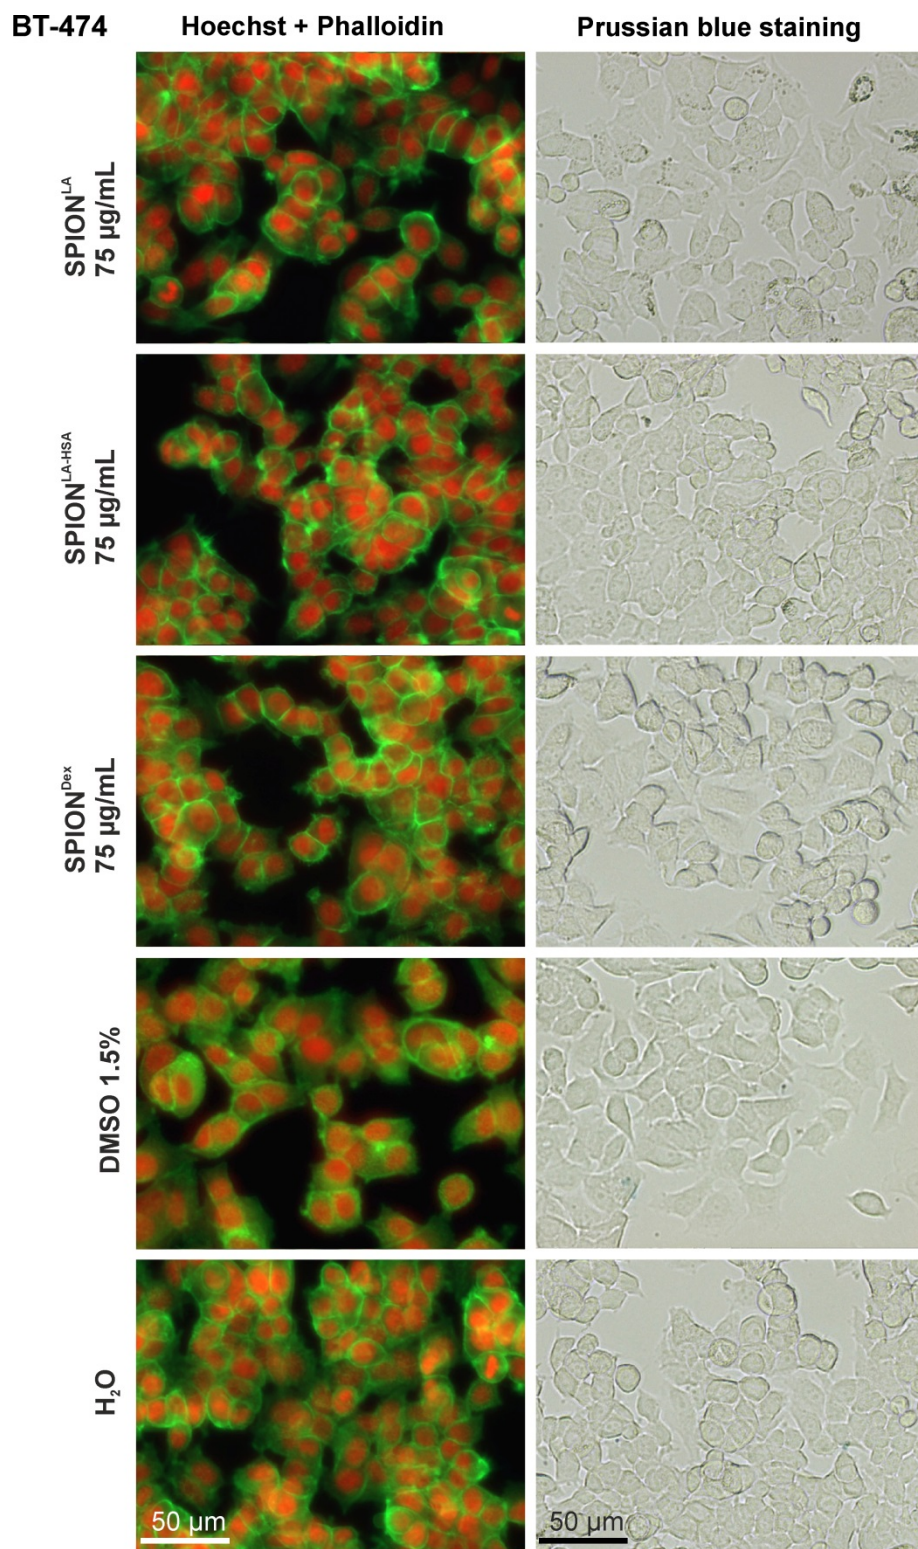

**Supplementary Figure 2: Images of the Cellular Particle-load and Cell Morphology after SPION Treatment.** BT-474 cells were incubated for 48 h with 75 µg/ml SPION<sup>LA</sup>, SPION<sup>LA-HSA</sup> and SPION<sup>Dex</sup>. Images were taken with a fluorescence microscope. Cells stained with Alexa Fluor 488 Phalloidin (green) and Hoechst 33342 (red) images are shown in the left column, Prussian blue staining is shown in the right column.

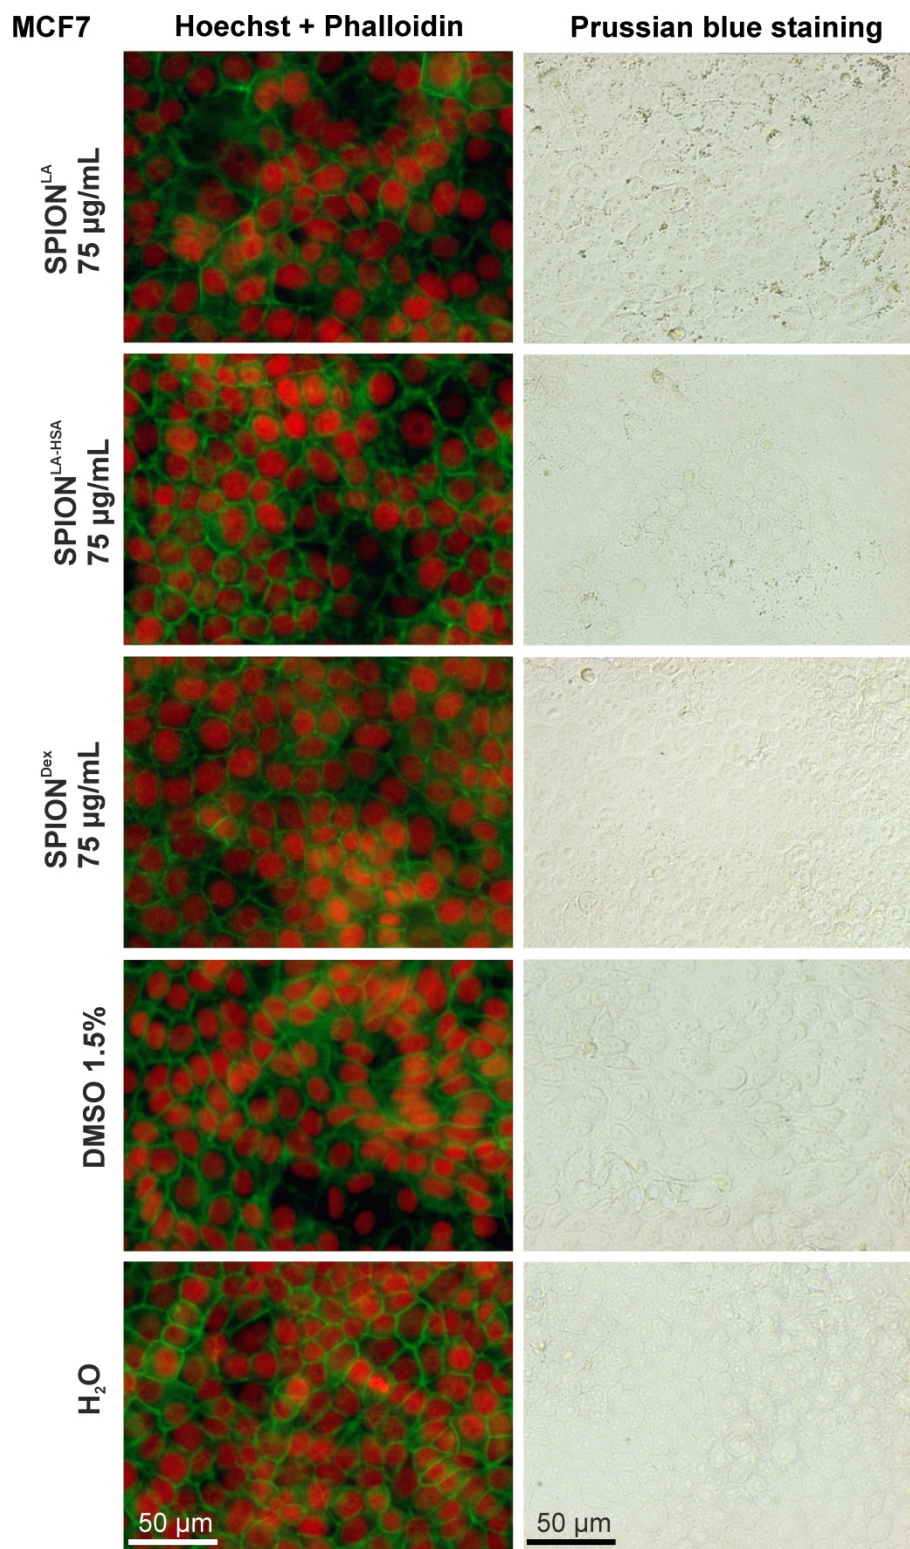

**Supplementary Figure 3: Images of the cellular Particle-load and Cell Morphology after SPION Treatment.** MCF7 cells were incubated for 48 h with 75 µg/ml SPION<sup>LA</sup>, SPION<sup>LA-HSA</sup> and SPION<sup>Dex</sup>. Images were taken with a fluorescence microscope. Cells stained with Alexa Fluor 488 Phalloidin (green) and Hoechst 33342 (red) images are shown in the left column, Prussian blue staining is shown in the right column.

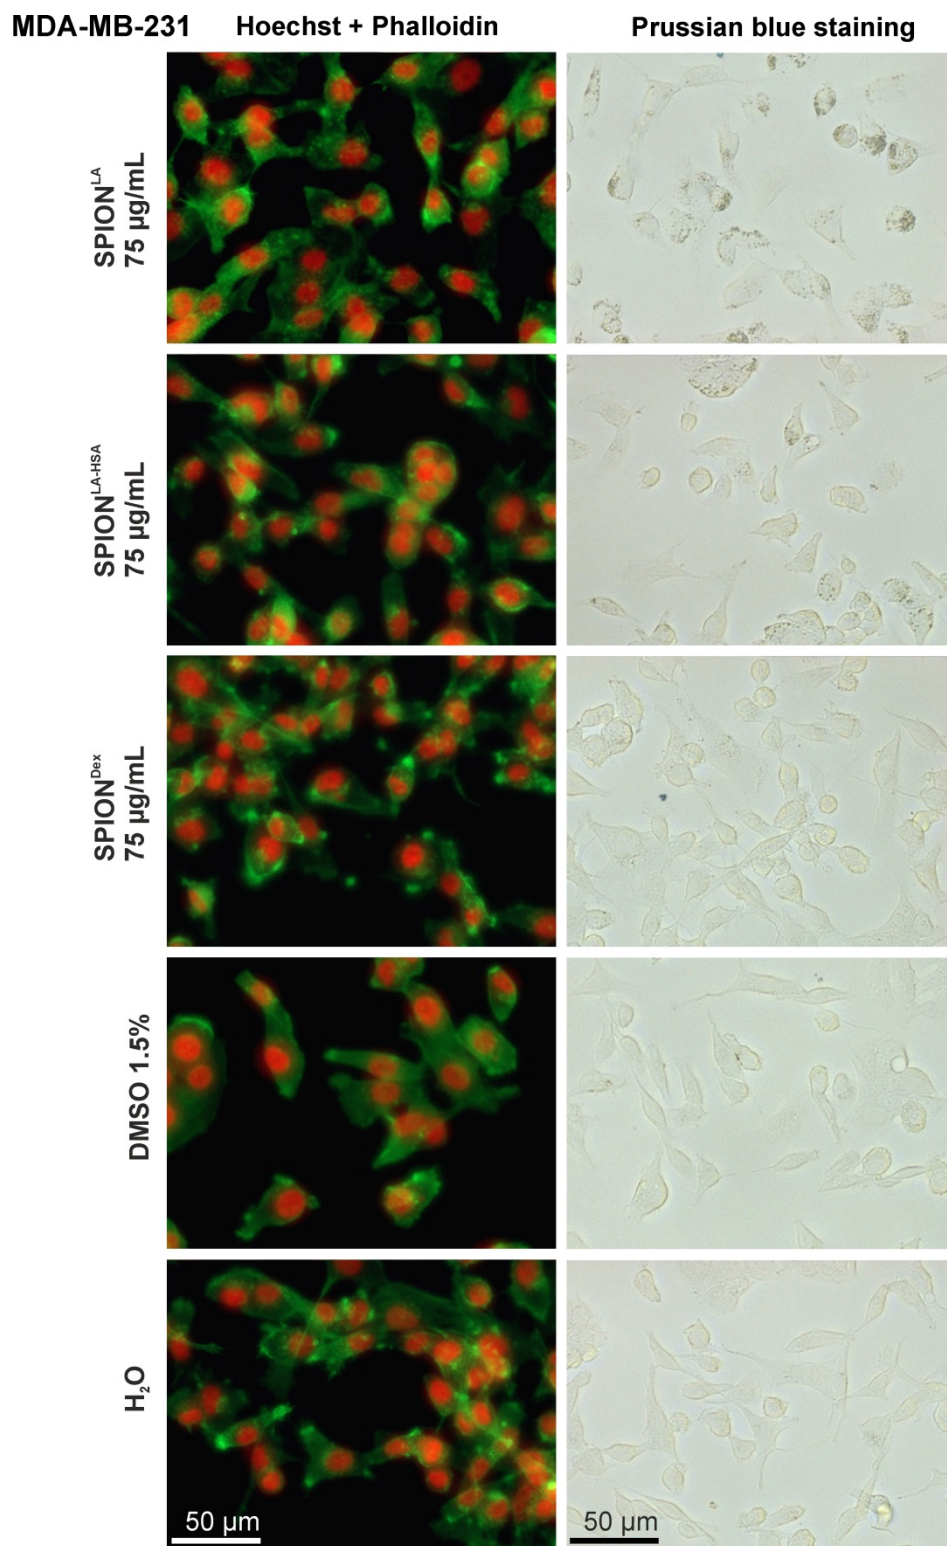

**Supplementary Figure 4: Images of the cellular Particle-load and Cell Morphology after SPION Treatment.** MDA-MB-231 cells were incubated for 48 h with 75 µg/ml SPION<sup>LA</sup>, SPION<sup>LA-HSA</sup> and SPION<sup>Dex</sup>. Images were taken with a fluorescence microscope. Cells stained with Alexa Fluor 488 Phalloidin (green) and Hoechst 33342 (red) images are shown in the left column, Prussian blue staining is shown in the right column.

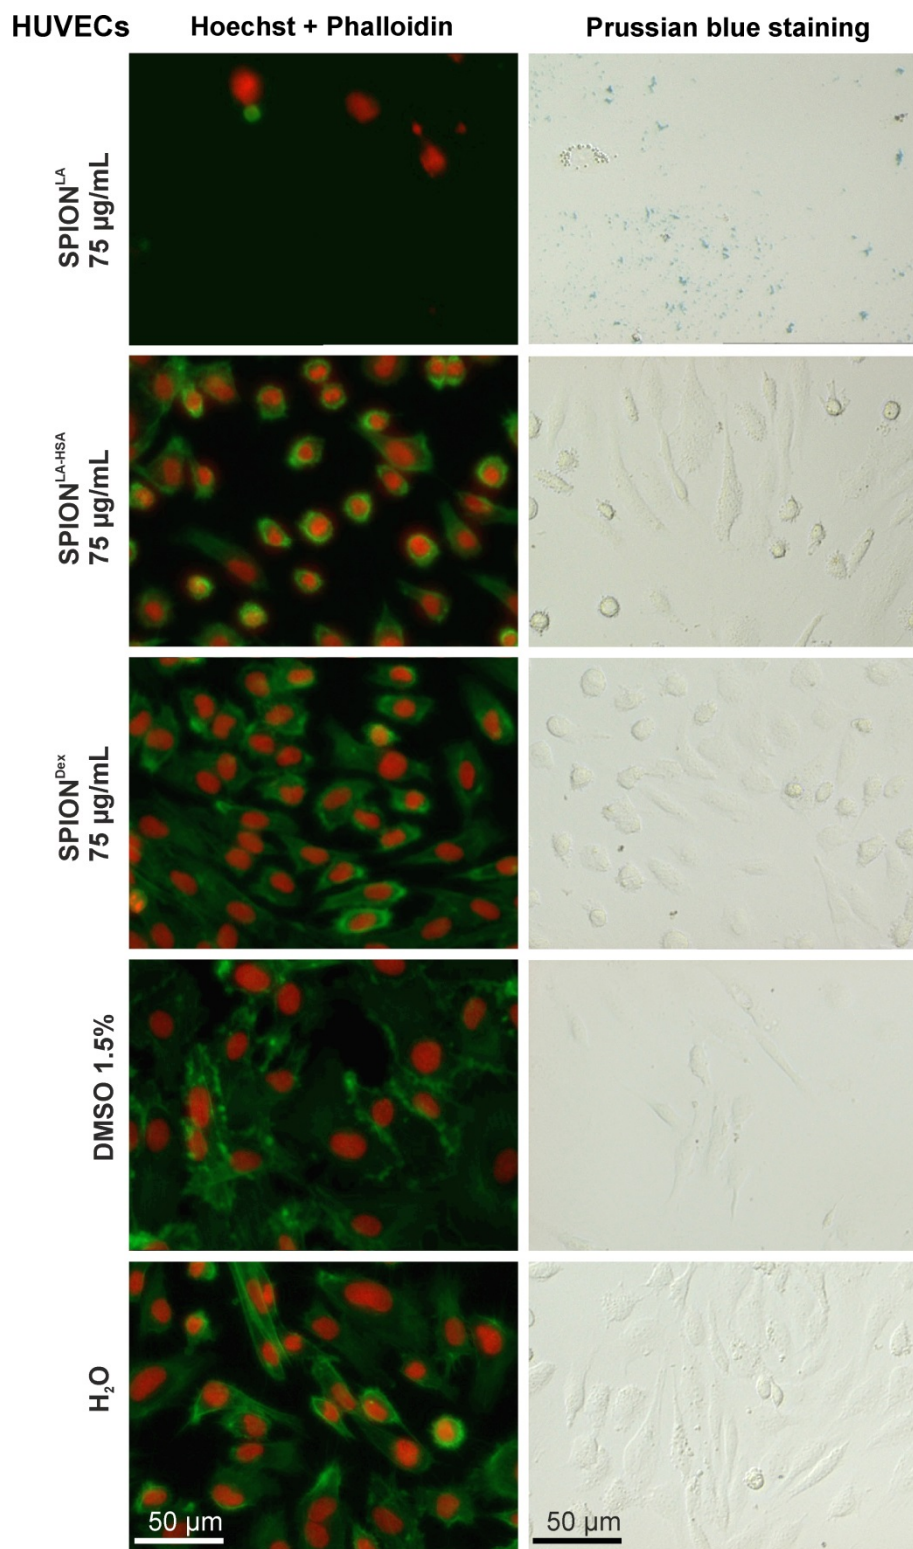

**Supplementary Figure 5: Images of the cellular Particle-load and Cell Morphology after SPION Treatment.** HUVECs were incubated for 48 h with 75 µg/ml SPION<sup>LA</sup>, SPION<sup>LA-HSA</sup> and SPION<sup>Dex</sup>. Images were taken with a fluorescence microscope. Cells stained with Alexa Fluor 488 Phalloidin (green) and Hoechst 33342 (red) images are shown in the left column, Prussian blue staining is shown in the right column.

**A**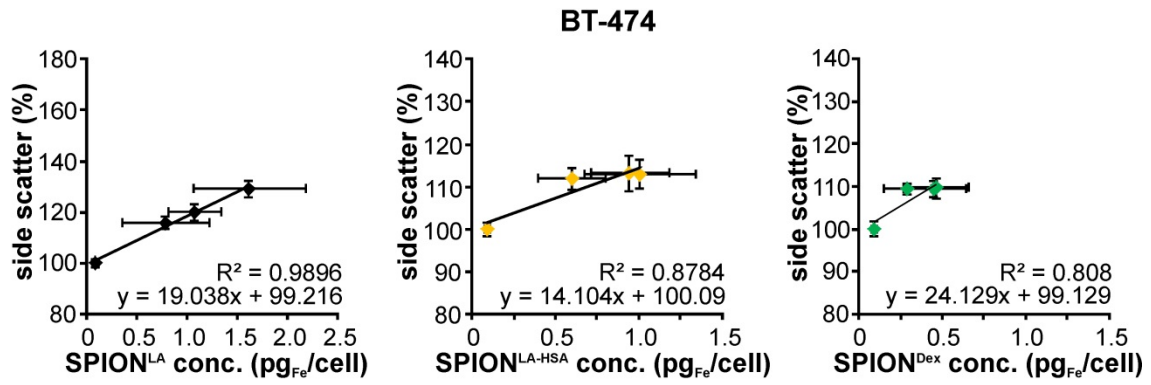**B**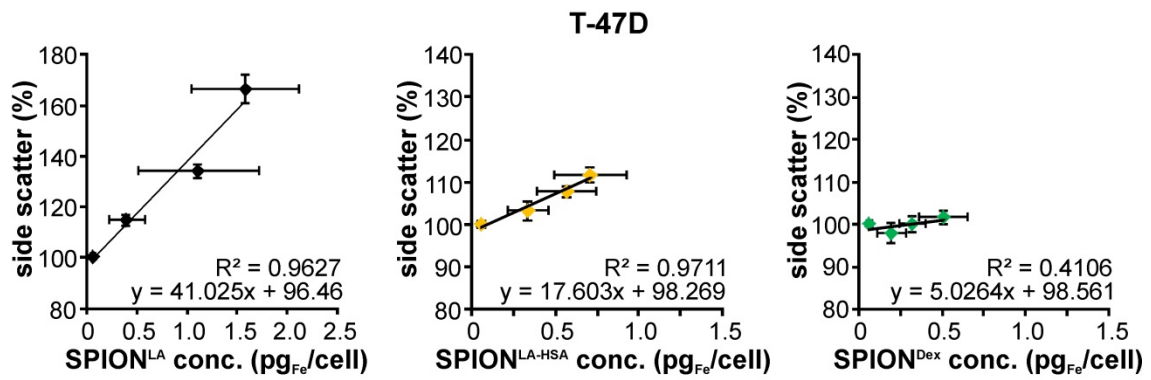**C**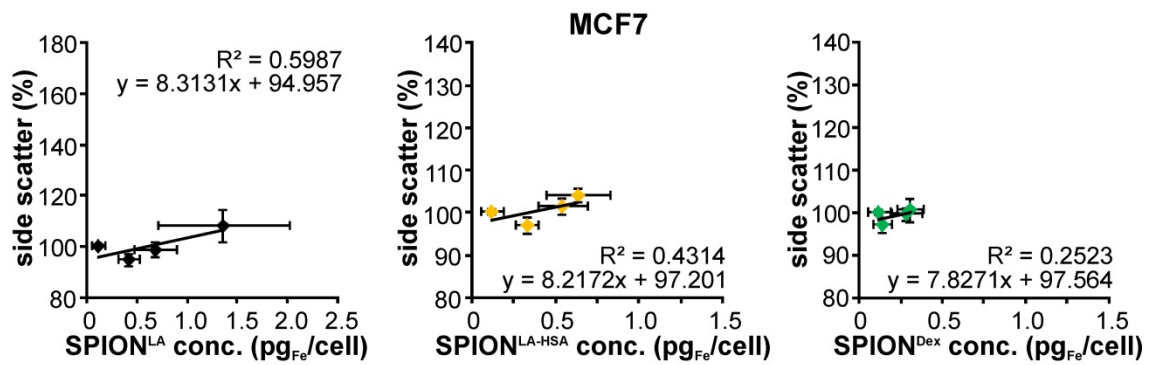**D**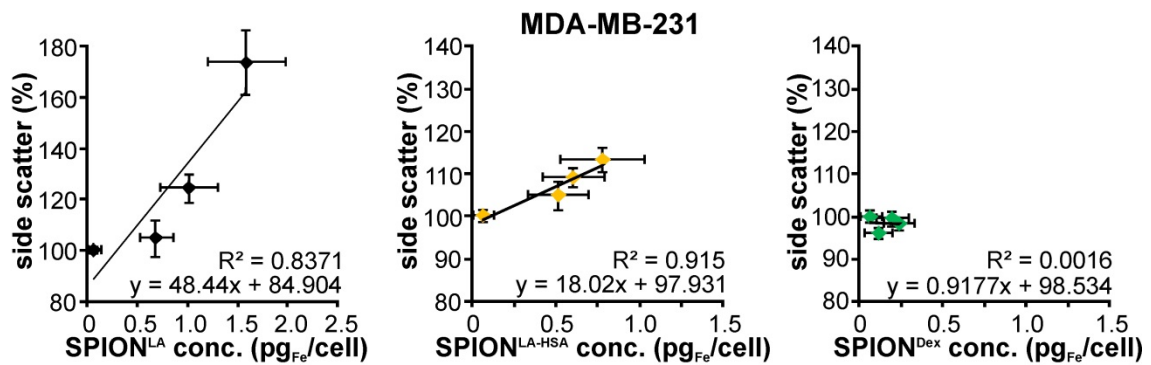**E**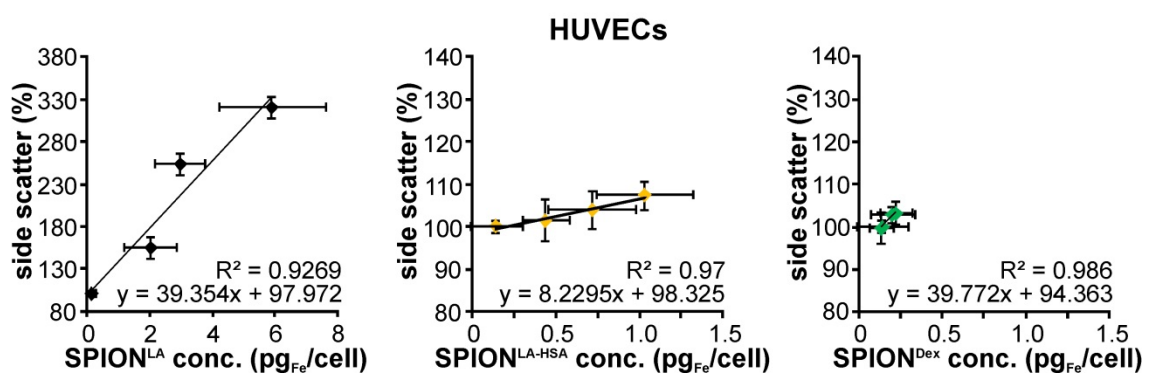

**Supplementary Figure 6: Correlation between Flow Cytometric Side Scatter Data (SSc) and Quantitative Cellular Iron Measurements by MP-AES.** Cells were incubated for 48 h with 0 - 75  $\mu\text{g/ml}$  SPION<sup>LA</sup>, SPION<sup>LA-HSA</sup> and SPION<sup>Dex</sup>. For SSc determination, it was gated on phenotypically viable cells (Ax-PI-) **(A-E)** Relationship between the cellular SPION load as measured by MP-AES and the normalized flow cytometric side scatter data. Correlations were shown for **(A)** BT-474, **(B)** T-47D, **(C)** MCF7, **(D)** MDA-MB-231 and **(E)** HUVECs incubated with different concentrations of SPION<sup>LA</sup> (left panel), SPION<sup>LA-HSA</sup> (middle panel) and SPION<sup>Dex</sup> (right panel). The data are expressed as the mean  $\pm$  standard deviation (n=4 with technical triplicates).  $R^2$  represents the coefficient of determination. y describes the mathematic relationship between side scatter and cellular iron content.

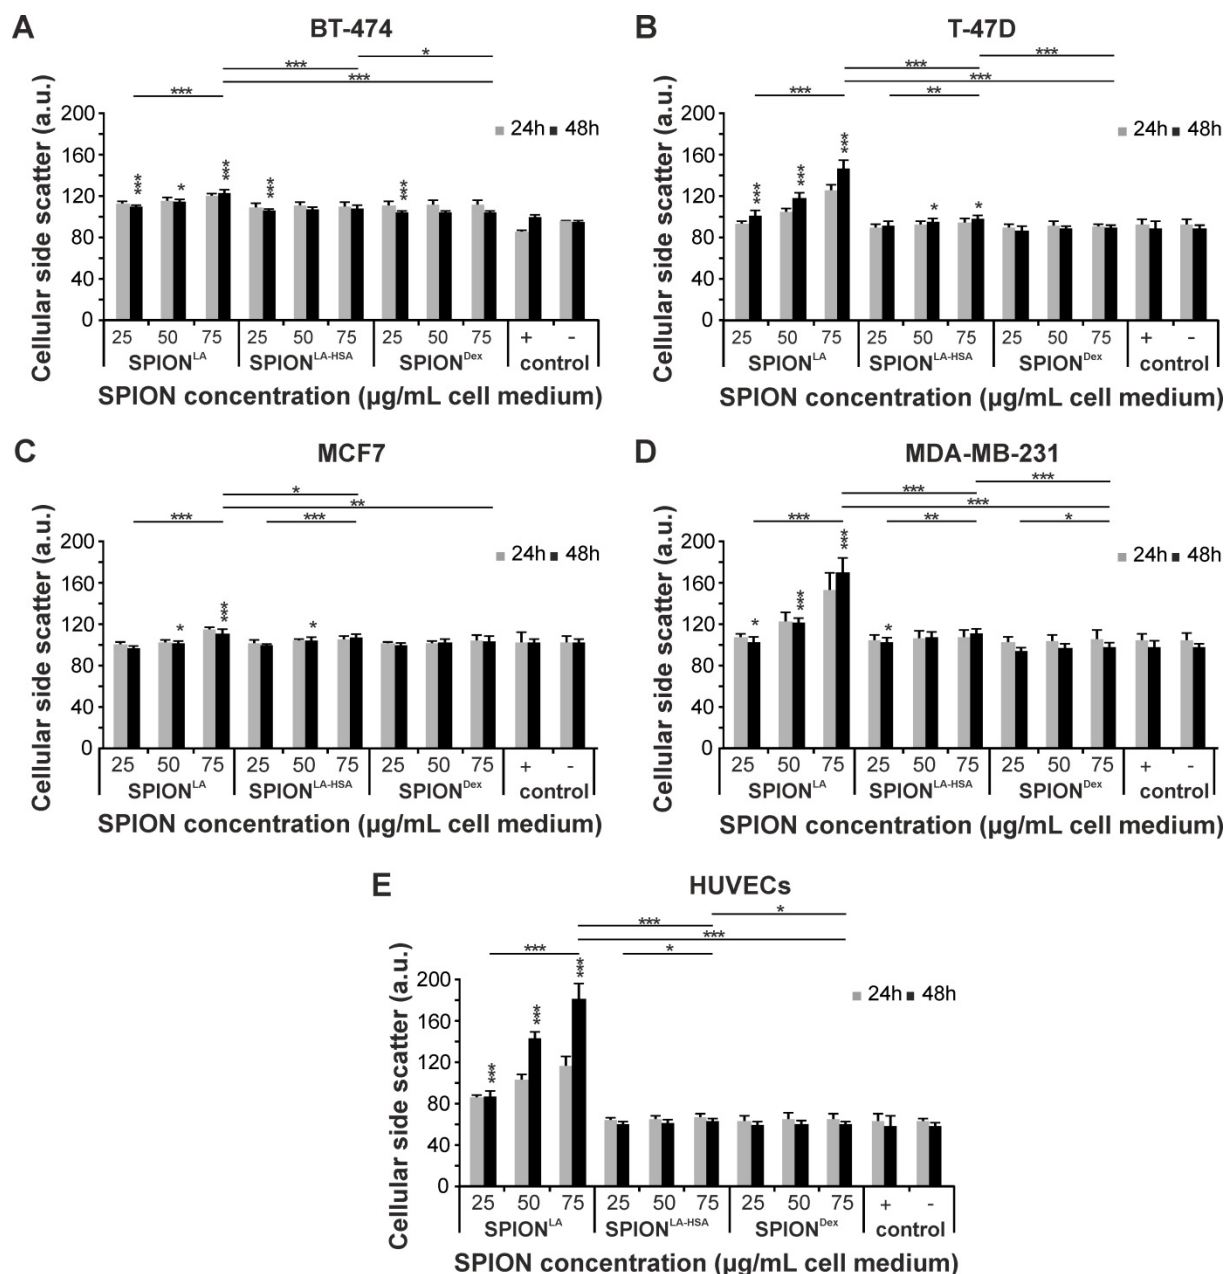

**Supplementary Figure 7: Evaluation of the Cellular Nanoparticle Load via SSc Measurements using Flow Cytometry.** Cells were incubated for 24 h and 48 h with different concentrations of SPION<sup>LA</sup>, SPION<sup>LA-HSA</sup> and SPION<sup>Dex</sup> and investigated by flow cytometry. For SSc determination, it was gated on phenotypically viable cells (Ax-PI-). SSc data are shown for **(A)** BT-474, **(B)** T-47D, **(C)** MCF7, **(D)** MDA-MB-231 and **(E)** HUVECs. Positive controls contain 2% DMSO, negative controls represent the corresponding amount of H<sub>2</sub>O instead of water-based ferrofluid. The data are expressed as the mean ± standard deviation (n=4 with technical triplicates). Statistical significance of 48 h data sets are indicated with \*p<0.05, \*\*p<0.001 and \*\*\*p<0.0001 and were calculated via Student's t-test. Asterisks shown directly on bars indicate dose-dependent significance to the next lower SPION concentration. Asterisks over the respective lines indicate dose-dependent significance between lowest and highest SPION concentration and between the highest SPION concentrations of different SPIONs. Abbreviations: SSc, side scatter; a.u., arbitrary unit.

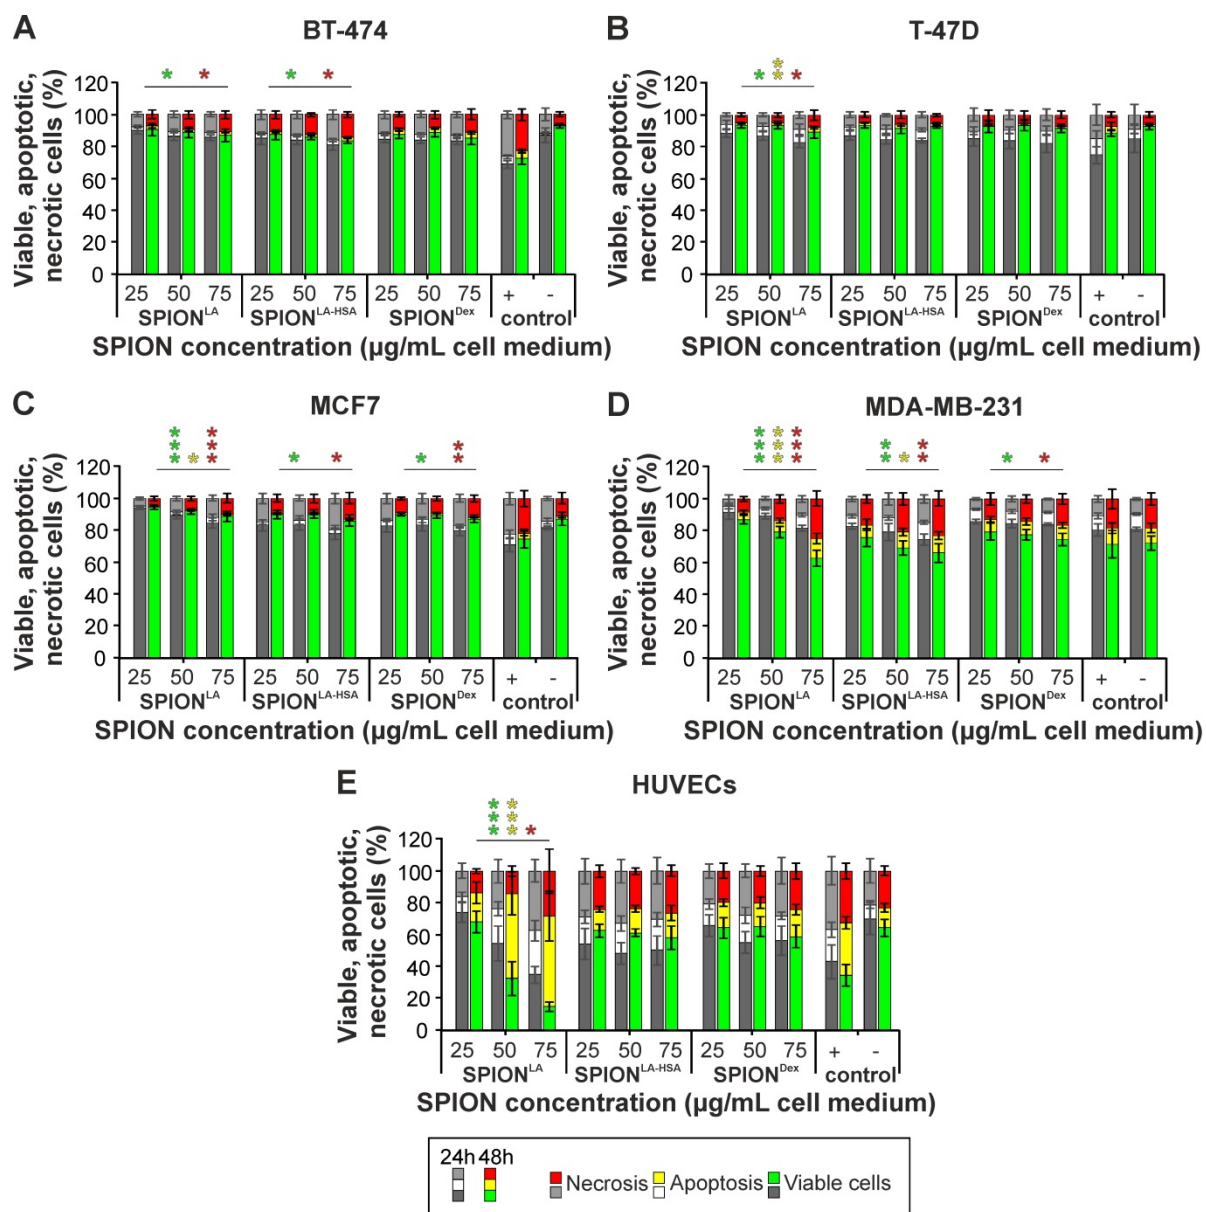

**Supplementary Figure 8: Time- and Dose-Dependent Viability of Different Cells after SPION Treatment.** Cells were incubated for 24 h and 48 h with increasing amounts of SPION<sup>LA</sup>, SPION<sup>LA-HSA</sup> and SPION<sup>Dex</sup>. Cell viability was determined by Annexin A5-Fitc/propidium iodide staining and analyzed by flow cytometry. The amount of viable (Ax-PI-), apoptotic (Ax+PI-) and necrotic (PI+) cells are shown for **(A)** BT-474, **(B)** T-47D, **(C)** MCF7, **(D)** MDA-MB-231 and **(E)** HUVECs. Positive controls contain 2% DMSO, negative controls represent the corresponding amount of H<sub>2</sub>O instead of water-based ferrofluid. Data are expressed as the mean  $\pm$  standard deviation (n=4 with technical triplicates). Statistical significance of 48 h data sets are indicated with \*p<0.05, \*\*p<0.001 and \*\*\*p<0.0001 and were calculated via Student's t-test. Colored asterisks indicate dose-dependent significance between lowest and highest SPION concentrations on necrosis (red asterisks), apoptosis (yellow asterisks) and viability (green asterisks).

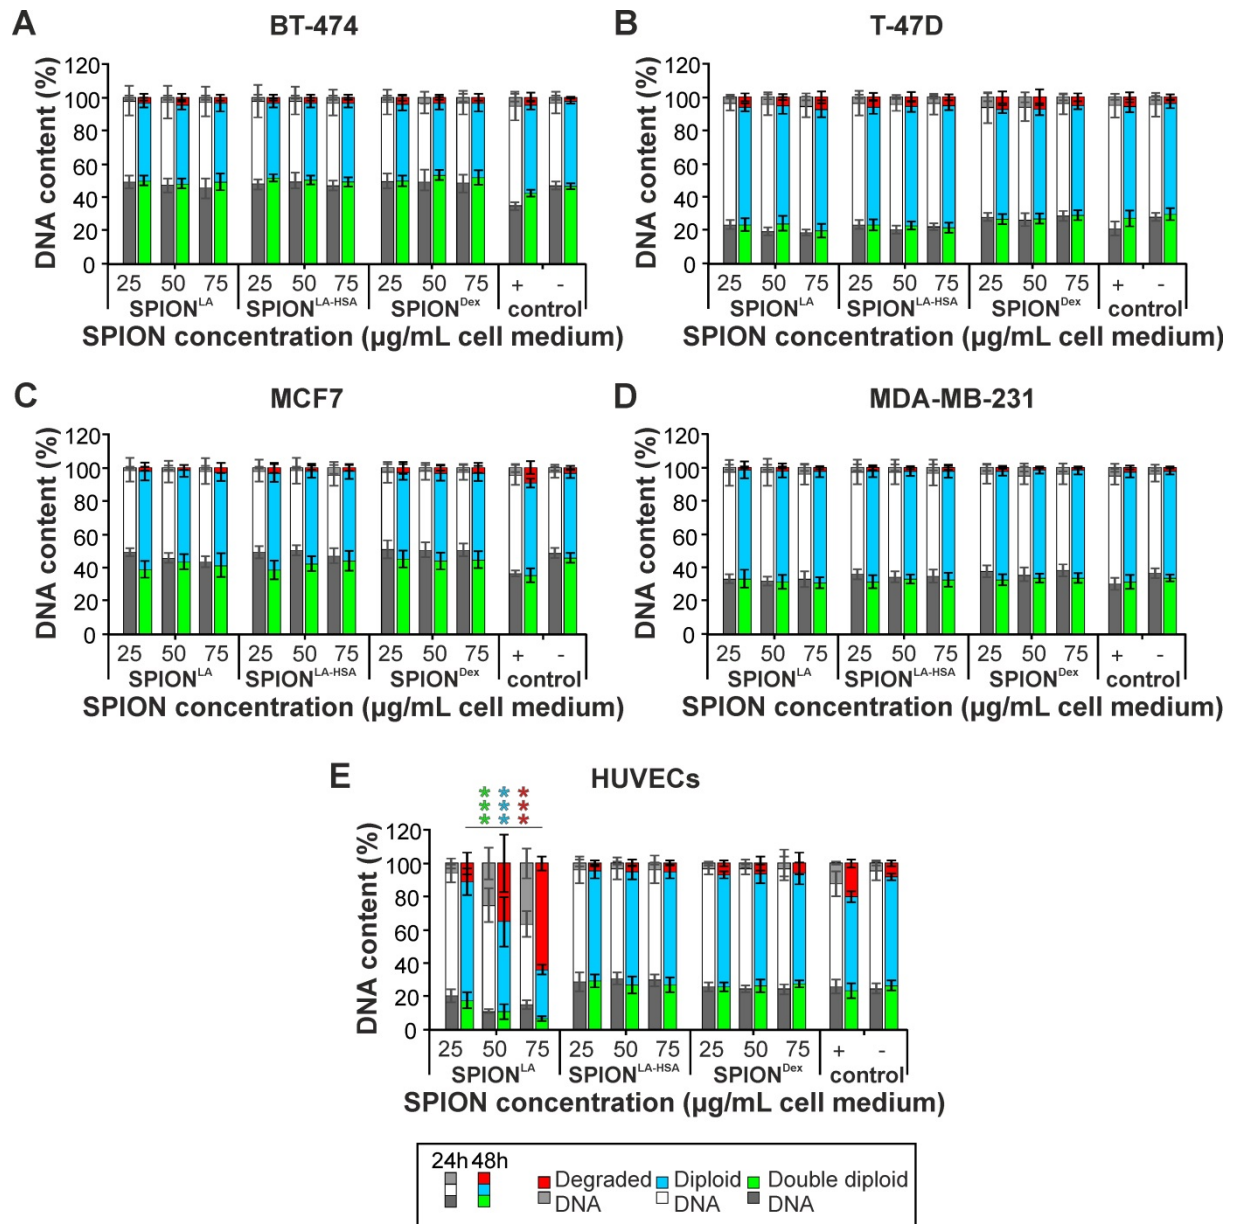

**Supplementary figure 9: Time- and Dose-Dependent DNA Degradation and Cell Cycle Analysis by Propidium Iodide-Triton X (PIT) Staining.** Cells were incubated for 24 h and 48 h with increasing amounts of SPION<sup>LA</sup>, SPION<sup>LA-HSA</sup> and SPION<sup>Dex</sup> and analyzed by flow cytometry. The DNA conditions are shown for **(A)** BT-474, **(B)** T-47D, **(C)** MCF7, **(D)** MDA-MB-231 and **(E)** HUVECs as the amount of degraded DNA, diploid DNA (G1-phase) and double diploid DNA (synthesis/G2-phase). Positive controls contain 2% DMSO, negative controls represent the corresponding amount of H<sub>2</sub>O instead of water-based ferrofluid. Data are expressed as the mean  $\pm$  standard deviation (n=4 with technical triplicates). Statistical significance of 48 h data sets are indicated with \*p<0.05, \*\*p<0.001 and \*\*\*p<0.0001 and were calculated via Student's t-test. Colored asterisks indicate dose-dependent significance between lowest and highest SPION concentrations on degraded DNA (red asterisks), diploid DNA (blue asterisks) and double diploid DNA (green asterisks).

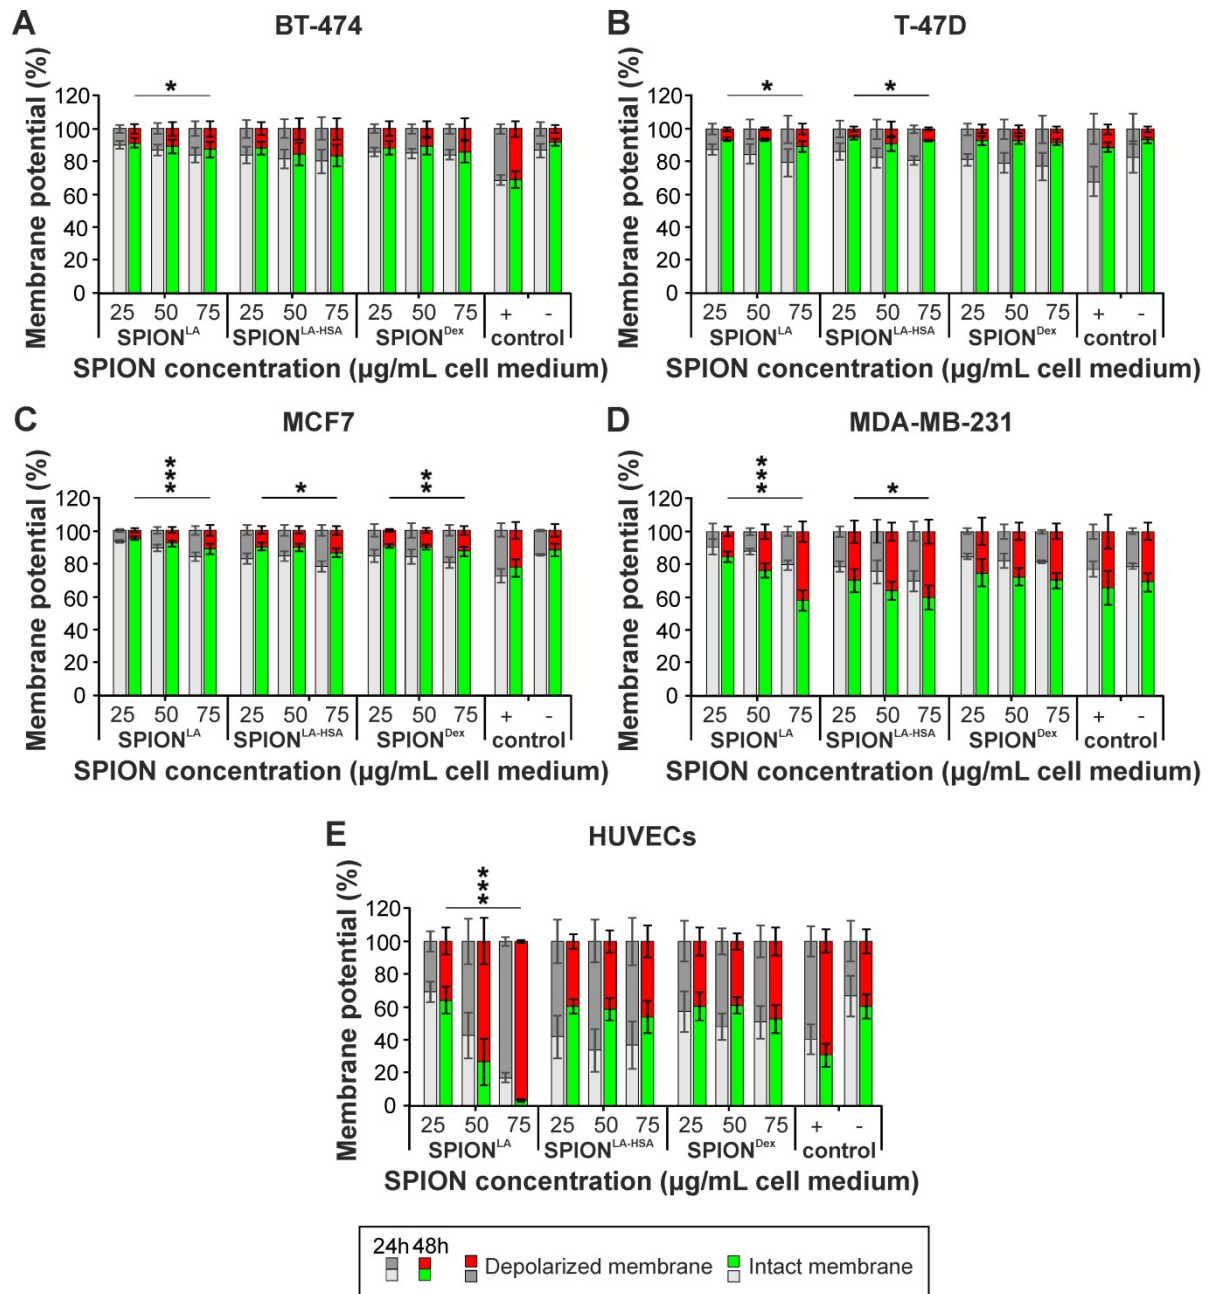

**Supplementary Figure 10: Time- and Dose-Dependent Changes of the Mitochondrial Membrane Potential in Different Cells after SPION Treatment.** Cells were incubated for 24 h and 48 h with increasing amounts of SPION<sup>LA</sup>, SPION<sup>LA-HSA</sup> and SPION<sup>Dex</sup>. Membrane integrity was determined by 1,1',3,3',3',3'-hexamethylindodicarbocyanine iodide (DiIC1(5)) staining and analyzed by flow cytometry. The amount of cells with intact (DiIC1(5) positive) and depolarized (DiIC1(5) negative) membrane potential are shown for **(A)** BT-474, **(B)** T-47D, **(C)** MCF7, **(D)** MDA-MB-231 and **(E)** HUVECs. Positive controls contain 2% DMSO, negative controls represent the corresponding amount of H<sub>2</sub>O instead of water-based ferrofluid. Data are expressed as the mean  $\pm$  standard deviation (n=4 with technical triplicates). Statistical significance of 48 h data sets are indicated with \*p<0.05, \*\*p<0.001 and \*\*\*p<0.0001 and were calculated via Student's t-test. Asterisks indicate dose-dependent significance between lowest and highest SPION concentration on mitochondrial membrane integrity.
